# Supplementary material for: Development of Quantum Dot (QD) Based Color Converters for Multicolor Display
Source: MDPI journal article supplement (doi:10.3390/nano11051089), 2021-04-23
Supplement: s1 [file s1]

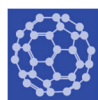

## Supplementary Information

# Development of Quantum Dots (QD) Based Color Converters for Multicolor Display

Muhammad T. Sajjad <sup>1,2,\*</sup>, Ashu K. Bansal <sup>1</sup>, Francesco Antolini <sup>3</sup>, Eduard Preis <sup>4</sup>, Lenuta Stroea <sup>5</sup>, Stefano Toffanin <sup>6</sup>, Michele Muccini <sup>6</sup>, Luca Ortolani <sup>7</sup>, Andrea Migliori <sup>7</sup>, Sybille Allard <sup>4</sup>, Ullrich Scherf <sup>4</sup> and Ifor D. W. Samuel <sup>1,\*</sup>

<sup>1</sup> Organic Semiconductor Centre, SUPA, School of Physics and Astronomy, University of St Andrews, North Haugh, St Andrews, Fife KY16 9SS, UK; ashu.bansal@gmail.com

<sup>2</sup> London Centre for Energy Engineering (LCEE), School of Engineering, London South Bank University, 103 Borough Road, London, SE1 0AA, UK

<sup>3</sup> ENEA Frascati, Via E. Fermi 45, 00044 Frascati (Rome); [dr.antolini.work@gmail.com](mailto:dr.antolini.work@gmail.com)

<sup>4</sup> Institut für Polymertechnologie Bergische Universität Wuppertal, Gauss-Strasse 20, 42097 Wuppertal, Germany; [preis@uni-wuppertal.de](mailto:preis@uni-wuppertal.de) (E.P.); [sallard@uni-wuppertal.de](mailto:sallard@uni-wuppertal.de) (S.A.); [scherf@uni-wuppertal.de](mailto:scherf@uni-wuppertal.de) (U.S.)

<sup>5</sup> Petru Poni Institute of Macromolecular Chemistry Gr. Ghica Voda Alley, 41 A, 700487 Iasi, Romania; elenah@icmpp.ro

<sup>6</sup> Consiglio Nazionale delle Ricerche (CNR) – Istituto per lo Studio dei Materiali Nanostrutturati (ISMN), Via P. Gobetti, 101, Bologna, Italy; [s.toffanin@bo.ismn.cnr.it](mailto:s.toffanin@bo.ismn.cnr.it) (S.T.); [mmuccini@bo.ismn.cnr.it](mailto:mmuccini@bo.ismn.cnr.it) (M.M.)

<sup>7</sup> Consiglio Nazionale delle Ricerche (CNR) – Institute for Microelectronics and Microsystems, Via Gobetti 101, Bologna (BO), Italy; [ortolani@bo.imm.cnr.it](mailto:ortolani@bo.imm.cnr.it) (L.O.); [migliori@bo.imm.cnr.it](mailto:migliori@bo.imm.cnr.it) (A.M.)

\* Correspondence: [sajjad@lsbu.ac.uk](mailto:sajjad@lsbu.ac.uk) (M.T.S.); [idws@st-andrews.ac.uk](mailto:idws@st-andrews.ac.uk) (I.D.W.S.).

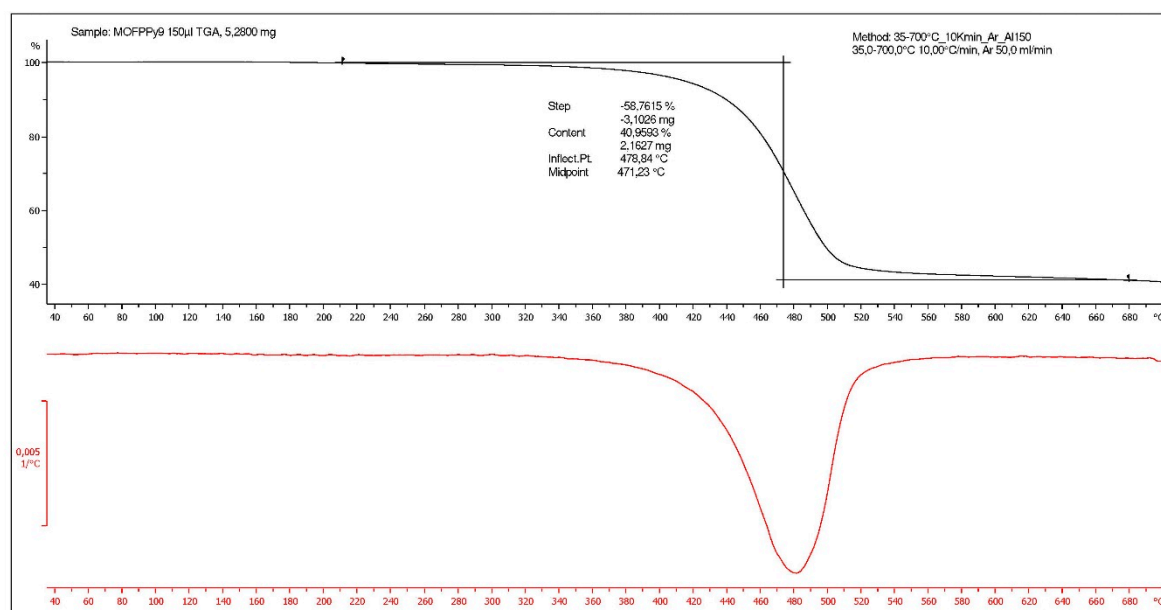

**Figure S1.** Thermogravimetric analysis of PPy9 performed under argon between 35 °C and 700 °C, showing its thermal stability up to 200 °C.

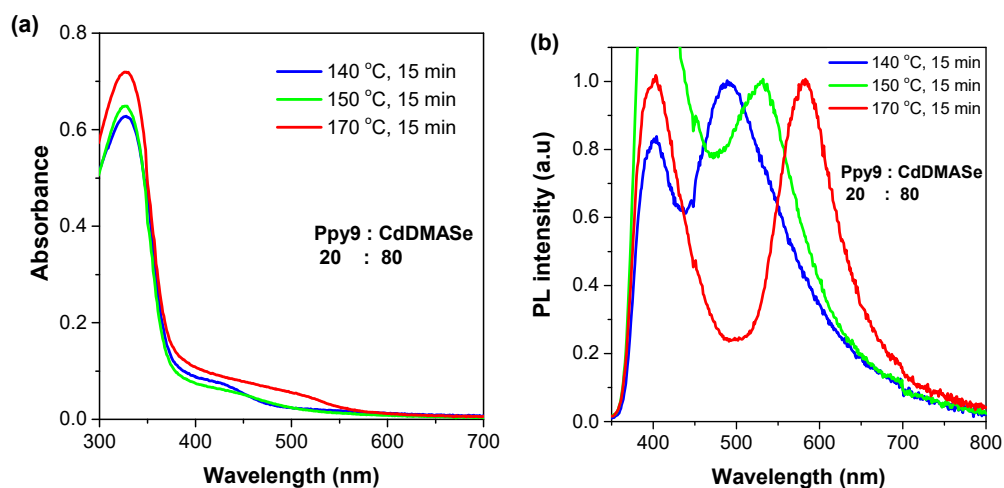

**Figure S2.** Absorption (a) and PL spectra (b) of blends of Ppy9 (20%) and CdDMASe (80%). The films were annealed at 140 °C, 150 °C and 170 °C for 15 min. PL spectra were obtained using excitation wavelength of 330 nm.

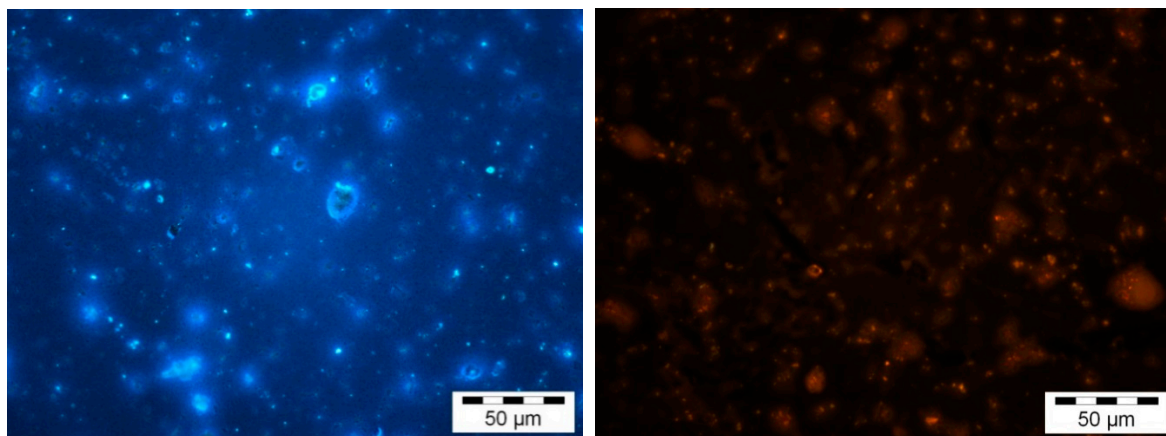

**Figure S3.** Fluorescence images of nanocomposite films of Ppy9 and CdDMASe before (left) and after baking at 170 °C for 15 min (right). These images were captured with a fluorescence microscope using an excitation wavelength of 355 nm.

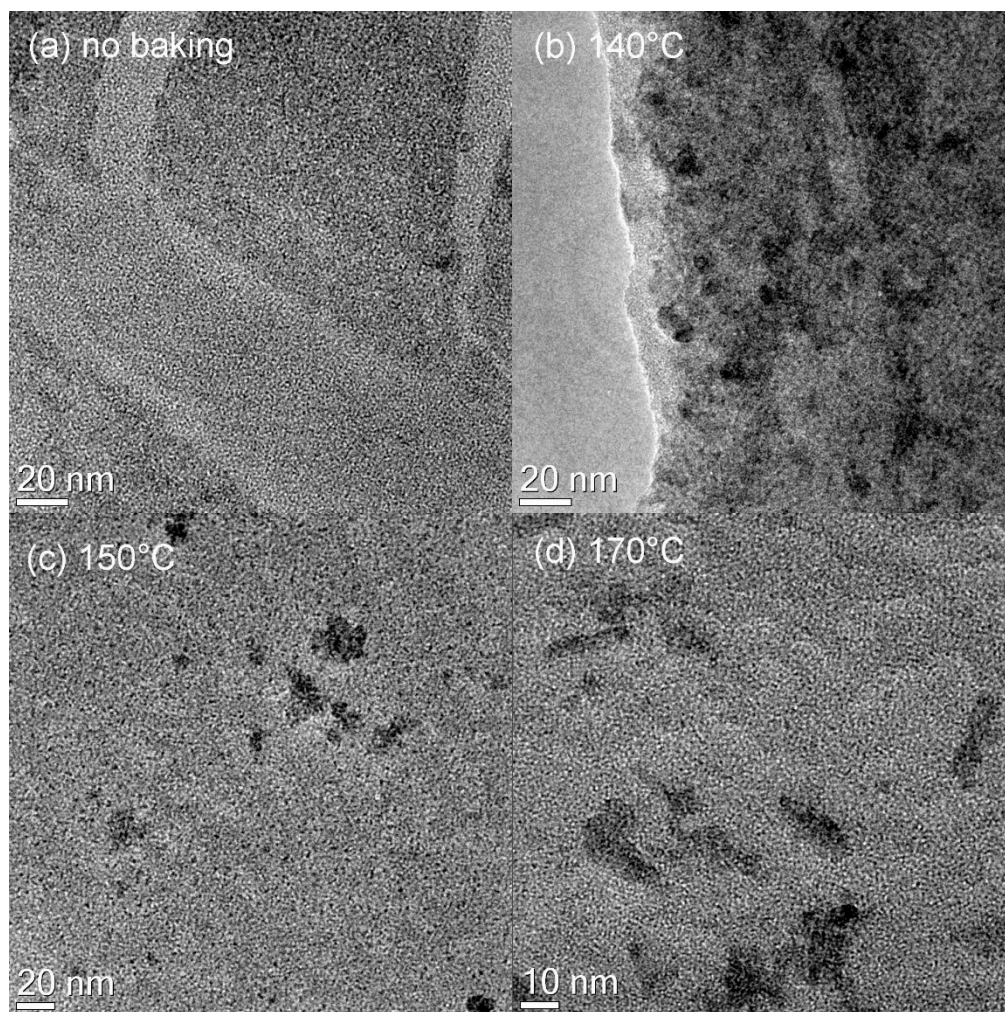

**Figure S4.** Larger view of the film during the heating process indicating the CdSe QDs distribution within the film under different baking conditions: **(a)** unbaked film, **(b)** film at 140 °C with small crystals presence, **(c)** film at 150 °C with presence of CdSe QDs and initial aggregation process (clusters of QDs); **(d)** film at 170 °C film with several clusters of QDs.

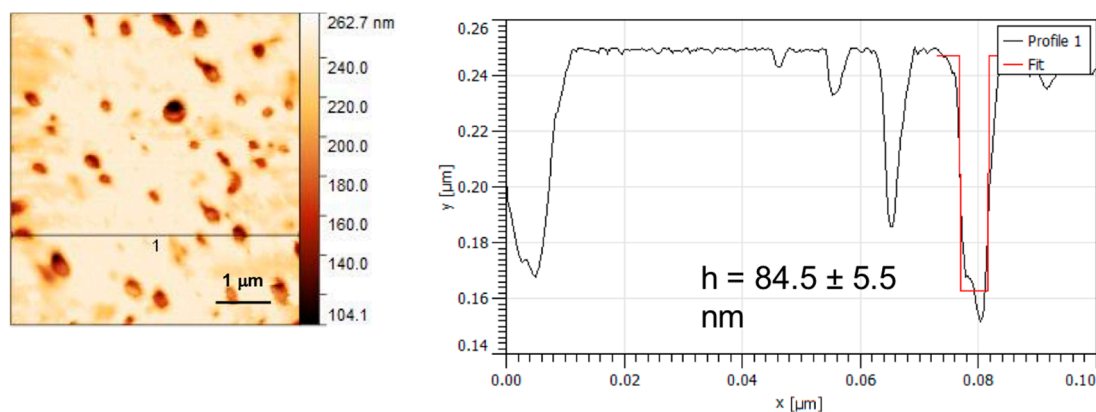

**S5a.**

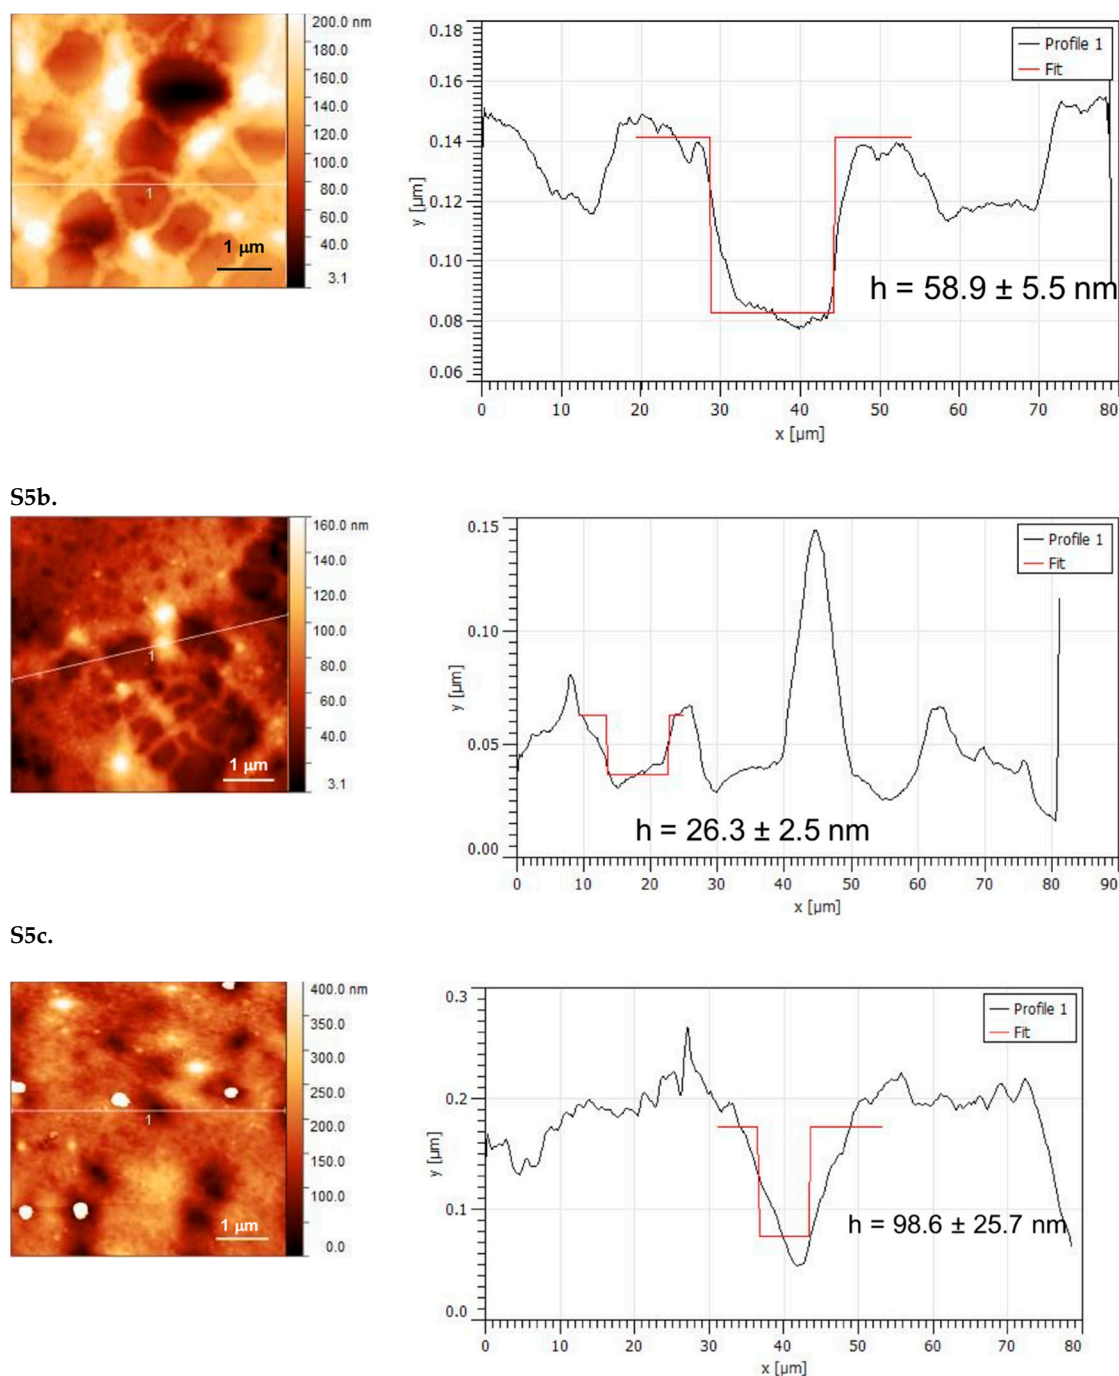

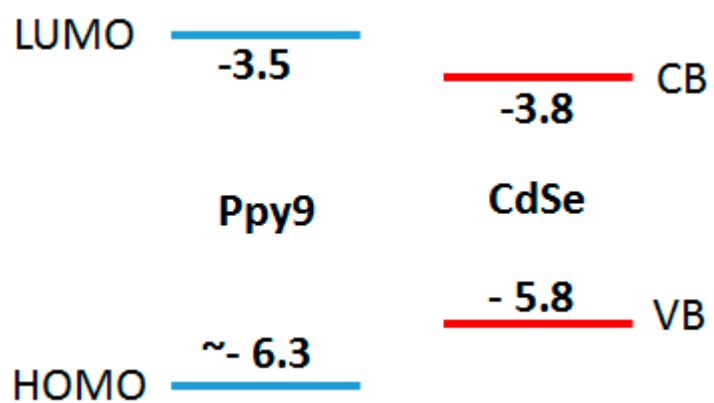

**Figure S6.** Energy levels of polymer Ppy9 and CdSe, showing type 1 alignment.
